# Supplementary material for: Behavioral coping phenotypes and associated psychosocial outcomes of pregnant and postpartum women during the COVID-19 pandemic
Source: PubMed Central journal article supplement (PMC8786860; doi:10.1038/s41598-022-05299-4), 2022-01-24
Supplement: 41598_2022_5299_MOESM1_ESM.pdf [file 41598_2022_5299_MOESM1_ESM.pdf]

## Supplementary Information

Behavioral coping phenotypes and associated psychosocial outcomes of pregnant and postpartum women during the COVID-19 pandemic

Denise M. Werchan<sup>1</sup>, Cassandra Hendrix<sup>1</sup>, Jennifer C. Ablow<sup>3</sup>, Ananda B. Amstadter<sup>4</sup>, Autumn C. Austin<sup>1</sup>, Vanessa Babineau<sup>5</sup>, G. Anne Bogat<sup>6</sup>, Leigh-Anne Cioffredi<sup>7</sup>, Elisabeth Conradt<sup>8</sup>, Sheila Crowell<sup>8</sup>, Dani Dumitriu<sup>5</sup>, William Fifer<sup>5</sup>, Morgan Firestein<sup>5</sup>, Wei Gao<sup>9</sup>, Ian H. Gotlib<sup>10</sup>, Alice Graham<sup>11</sup>, Kimberly D. Gregory<sup>9</sup>, Hanna C. Gustafsson<sup>11</sup>, Kathryn L. Havens<sup>12</sup>, Brittany R Howell<sup>13</sup>, Kathryn L. Humphreys<sup>14</sup>, Lucy S. King<sup>10</sup>, Patricia Kinser<sup>4</sup>, Elizabeth E. Krans<sup>15</sup>, Carly Lenniger<sup>1</sup>, Alytia A. Levendosky<sup>6</sup>, Joseph S. Lonstein<sup>6</sup>, Rachel Marcus<sup>9</sup>, Catherine Monk<sup>5</sup>, Sara Moyer<sup>4</sup>, Maria Muzik<sup>16</sup>, Amy K. Nuttall<sup>6</sup>, Alexandra S Potter<sup>7</sup>, Amy Salisbury<sup>4</sup>, Lauren C. Shuffrey<sup>5</sup>, Beth A. Smith<sup>12</sup>, Lynne Smith<sup>17</sup>, Elinor L. Sullivan<sup>11</sup>, Judy Zhou<sup>12</sup>, Moriah E. Thomason<sup>1\*</sup>, & Natalie H. Brito<sup>2\*</sup>

Denise M Werchan

Email: [denise.werchan@nyulangone.org](mailto:denise.werchan@nyulangone.org)

Table S1. LPA model fits for pregnant and postpartum women.

|           | <b>BIC</b>      |                   | <b>Entropy</b>  |                   | <b>Smallest profile (%)</b> |                   | <b>LMR <i>p</i> value</b> |                   |
|-----------|-----------------|-------------------|-----------------|-------------------|-----------------------------|-------------------|---------------------------|-------------------|
|           | <i>Pregnant</i> | <i>Postpartum</i> | <i>Pregnant</i> | <i>Postpartum</i> | <i>Pregnant</i>             | <i>Postpartum</i> | <i>Pregnant</i>           | <i>Postpartum</i> |
| 2-profile | 5521            | 4142              | .90             | .90               | 47%                         | 50%               | < .001                    | < .001            |
| 3-profile | 5352            | 3979              | .82             | .85               | 7%                          | 7%                | < .001                    | .04               |
| 4-profile | 5155            | 3810              | .78             | .86               | 12%                         | 8%                | < .001                    | < .001            |
| 5-profile | 5166            | 3793              | .76             | .84               | 6%                          | 2%                | .41                       | .75               |

*Note.* BIC = Bayesian Information Criteria; LMR = Lo-Mendell-Rubin.

Table S2. Mean comparisons of coping strategies between profiles for pregnant women.

|                            | <b>Low-coping<br/>(n = 1188)</b> | <b>Passive-coping<br/>(n = 960)</b> | <b>Active-coping<br/>(n = 349)</b> | <b>High-coping<br/>(n = 379)</b> |          |            |
|----------------------------|----------------------------------|-------------------------------------|------------------------------------|----------------------------------|----------|------------|
|                            | <i>M (SD)</i>                    | <i>M (SD)</i>                       | <i>M (SD)</i>                      | <i>M (SD)</i>                    | <i>F</i> | $\eta_p^2$ |
| <b>Self-Care</b>           | .24 (.17) <sup>b</sup>           | .20 (.15) <sup>b</sup>              | .67 (.15) <sup>a</sup>             | .63 (.16) <sup>a</sup>           | 1298.72  | .58        |
| <b>Social Support</b>      | .31 (.21) <sup>b</sup>           | .33 (.21) <sup>b</sup>              | .50 (.23) <sup>a</sup>             | .53 (.23) <sup>a</sup>           | 156.65   | .14        |
| <b>Avoiding media/news</b> | .40 (.26) <sup>b</sup>           | .30 (.26) <sup>c</sup>              | .61 (.30) <sup>a</sup>             | .37 (.30) <sup>b</sup>           | 109.71   | .10        |
| <b>Vegging out</b>         | .16 (.17) <sup>b</sup>           | .80 (.16) <sup>a</sup>              | .15 (.17) <sup>b</sup>             | .81 (.17) <sup>a</sup>           | 3706.66  | .80        |
| <b>Substance Use</b>       | .01 (.09) <sup>b</sup>           | .02 (.15) <sup>a</sup>              | .01 (.09) <sup>a</sup>             | .02 (.14) <sup>a</sup>           | 3.50     | <.01       |
| <b>Healthcare</b>          | .11 (.31) <sup>c</sup>           | .17 (.11) <sup>b</sup>              | .23 (.42) <sup>b</sup>             | .31 (.46) <sup>a</sup>           | 32.07    | .03        |

Differing subscripts within rows indicate significantly different means at  $p < .05$ , with Tukey's HSD correction.

Table S3. Mean comparisons of coping strategies between profiles for postpartum women.

|                            | <b>Low-coping<br/>(n = 595)</b> | <b>Passive-coping<br/>(n = 635)</b> | <b>Active-coping<br/>(n = 178)</b> | <b>High-coping<br/>(n = 128)</b> |          |            |
|----------------------------|---------------------------------|-------------------------------------|------------------------------------|----------------------------------|----------|------------|
|                            | <i>M (SD)</i>                   | <i>M (SD)</i>                       | <i>M (SD)</i>                      | <i>M (SD)</i>                    | <i>F</i> | $\eta_p^2$ |
| <b>Self-Care</b>           | .14 (.12) <sup>b</sup>          | .13 (.13) <sup>b</sup>              | .59 (.14) <sup>a</sup>             | .60 (.14) <sup>a</sup>           | 1017.26  | .67        |
| <b>Social Support</b>      | .34 (.21) <sup>b</sup>          | .36 (.22) <sup>b</sup>              | .47 (.26) <sup>a</sup>             | .52 (.25) <sup>a</sup>           | 30.27    | .06        |
| <b>Avoiding media/news</b> | .43 (.29) <sup>b</sup>          | .34 (.27) <sup>c</sup>              | .52 (.33) <sup>a</sup>             | .41 (.34) <sup>b</sup>           | 22.70    | .04        |
| <b>Vegging out</b>         | .16 (.17) <sup>b</sup>          | .82 (.17) <sup>a</sup>              | .16 (.17) <sup>b</sup>             | .81 (.17) <sup>a</sup>           | 2019.52  | .80        |
| <b>Substance Use</b>       | .14 (.34) <sup>c</sup>          | .24 (.43) <sup>b</sup>              | .24 (.43) <sup>b</sup>             | .41 (.50) <sup>a</sup>           | 18.81    | .04        |
| <b>Healthcare</b>          | .14 (.35) <sup>b</sup>          | .14 (.35) <sup>b</sup>              | .19 (.39) <sup>b</sup>             | .26 (.44) <sup>a</sup>           | 4.53     | .01        |

Differing subscripts within rows indicate significantly different means at  $p < .05$ , with Tukey's HSD correction.

Table S4. Multinomial logistic regression of predictors of latent profile membership for pregnant women.

|                                            | <b>High-coping (vs. low)</b> |           |                   | <b>Passive-coping (vs. low)</b> |           |                   | <b>Active-coping (vs. low)</b> |           |                   |
|--------------------------------------------|------------------------------|-----------|-------------------|---------------------------------|-----------|-------------------|--------------------------------|-----------|-------------------|
|                                            | <i>B</i>                     | <i>SE</i> | <i>Odds ratio</i> | <i>B</i>                        | <i>SE</i> | <i>Odds ratio</i> | <i>B</i>                       | <i>SE</i> | <i>Odds ratio</i> |
| <b>Black<sup>a</sup></b>                   | -0.62                        | .41       | 0.54              | -0.43*                          | 0.21      | 0.65              | -1.21*                         | 0.55      | 0.30              |
| <b>Hispanic/Latin<sup>a</sup></b>          | -0.46                        | .32       | 0.63              | -0.32                           | 0.17      | 0.73              | -0.44                          | 0.31      | 0.65              |
| <b>Asian<sup>a</sup></b>                   | -0.10                        | 0.26      | 0.90              | -0.10                           | 0.18      | 0.91              | -0.88*                         | 0.42      | 0.42              |
| <b>Two or more races/other<sup>a</sup></b> | -0.16                        | 0.38      | 0.85              | 0.13                            | 0.22      | 1.14              | 0.48                           | 0.14      | 1.61              |
| <b>Maternal age</b>                        | -0.02                        | 0.02      | 0.98              | -0.02                           | 0.01      | 0.98              | 0.03                           | 0.02      | 1.03              |
| <b>Children</b>                            | -0.49*                       | 0.22      | 0.61              | -0.07                           | 0.05      | 0.92              | -0.46**                        | 0.13      | 0.64              |
| <b>Education</b>                           | 0.14*                        | 0.07      | 1.15              | 0.004*                          | 0.001     | 1.004             | 0.00                           | 0.00      | 1.00              |
| <b>Income</b>                              | 0.00                         | 0.02      | 1.01              | 0.01                            | 0.02      | 1.01              | -0.04                          | 0.03      | 0.96              |

<sup>a</sup> Race/ethnicity was dummy-coded, with white as the reference category

\*  $p < .05$

\*\*  $p < .01$

Table S5. Multinomial logistic regression of predictors of latent profile membership for postpartum women.

|                                             | High-coping (vs. low) |           |                   | Passive-coping (vs. low) |           |                   | Active-coping (vs. low) |           |                   |
|---------------------------------------------|-----------------------|-----------|-------------------|--------------------------|-----------|-------------------|-------------------------|-----------|-------------------|
|                                             | <i>B</i>              | <i>SE</i> | <i>Odds ratio</i> | <i>B</i>                 | <i>SE</i> | <i>Odds ratio</i> | <i>B</i>                | <i>SE</i> | <i>Odds ratio</i> |
| <b>Black</b> <sup>a</sup>                   | 0.18                  | 0.62      | 1.20              | 0.85**                   | 0.30      | 2.33              | 0.70                    | 0.46      | 2.01              |
| <b>Hispanic/Latin</b> <sup>a</sup>          | -0.63                 | 0.47      | 0.54              | 0.11                     | 0.22      | 1.11              | -0.20                   | 0.38      | 0.82              |
| <b>Asian</b> <sup>a</sup>                   | -0.40                 | 0.47      | 0.67              | -0.10                    | 0.24      | 0.90              | -0.35                   | 0.45      | 0.70              |
| <b>Two or more races/other</b> <sup>a</sup> | 0.55                  | 0.48      | 1.73              | 0.18                     | 0.33      | 1.20              | 0.45                    | 0.46      | 1.56              |
| <b>Maternal age</b>                         | -0.04                 | 0.03      | 0.96              | -0.04*                   | 0.02      | 0.96              | -0.05                   | 0.03      | 0.95              |
| <b>Children</b>                             | -0.22                 | 0.27      | 0.80              | 0.02                     | 0.07      | 1.02              | -0.12                   | 0.10      | 0.89              |
| <b>Education</b>                            | 0.23*                 | 0.10      | 1.25              | 0.12*                    | 0.05      | 1.13              | 0.23*                   | 0.10      | 1.26              |
| <b>Income</b>                               | -0.04                 | 0.03      | 1.20              | 0.02                     | 0.02      | 1.02              | 0.00                    | 0.03      | 1.00              |

<sup>a</sup> Race/ethnicity was dummy-coded, with white as the reference category

\*  $p < .05$

\*\*  $p < .01$
